# Supplementary material for: Androgen Deprivation Therapy for Prostate Cancer Influences Body Composition Increasing Risk of Sarcopenia
Source: Nutrients. 2023 Mar 28;15(7):1631. doi: 10.3390/nu15071631 (PMC10096521; doi:10.3390/nu15071631)
Supplement: Supplementary file 1 [file nutrients-15-01631-s001.zip › nutrients-2266489-supplementary.pdf]

## Supplementary file

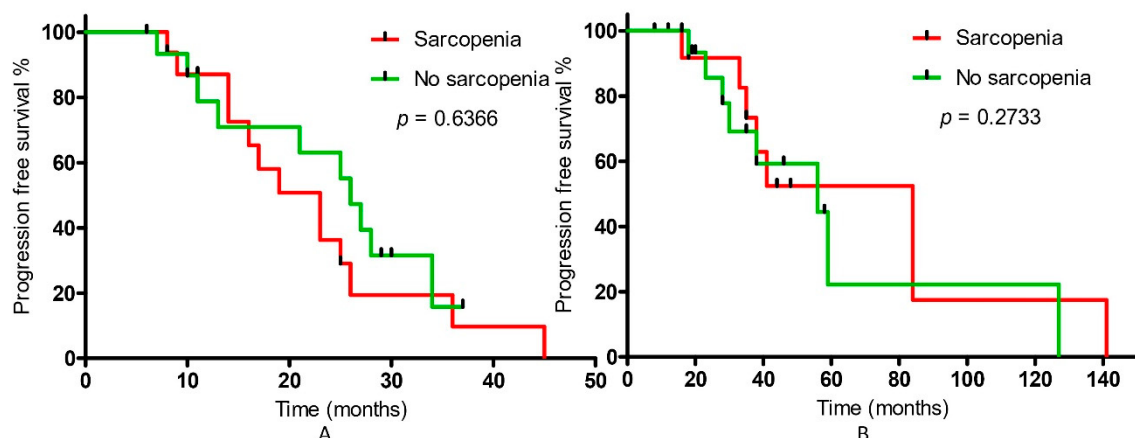

**Figure S1** Progression-free survival distribution for patients A. undergoing ADT therapy with docetaxel due to newly diagnosed, hormone-sensitive, metastatic prostate cancer B. with castration-resistant metastatic prostate cancer, continuing ADT therapy in combination with enzalutamide or abiraterone acetate in relation to sarcopenia from 1st computed tomography

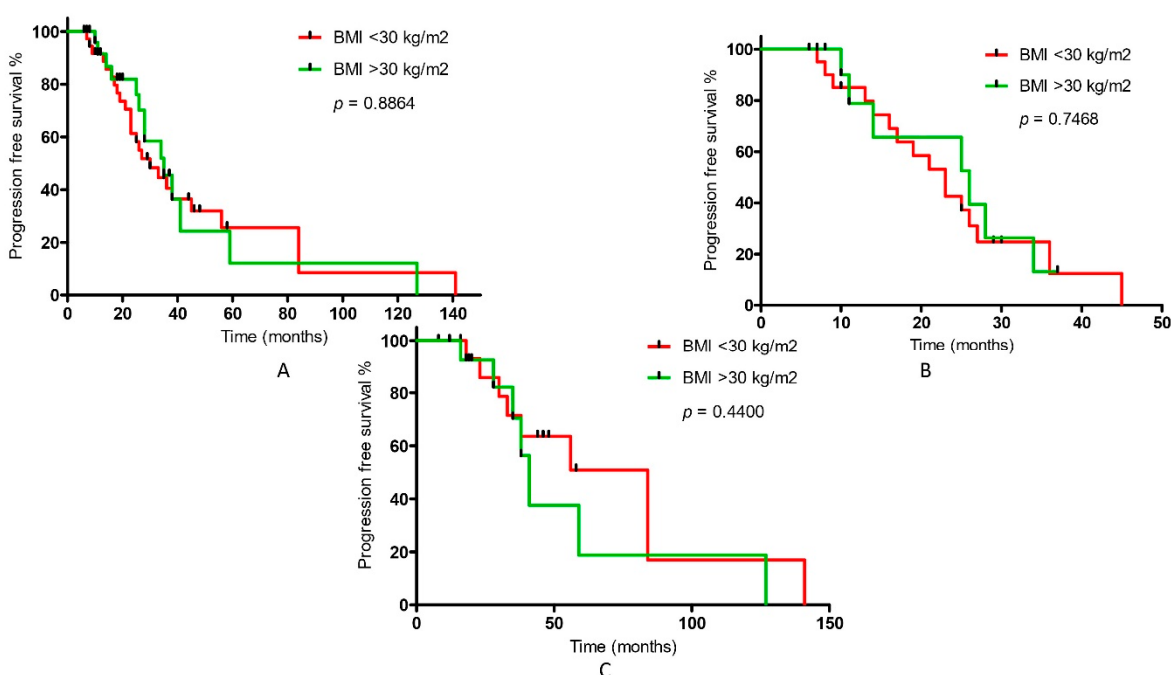

**Figure S2** The distribution of progression-free survival for A. all patients with prostate cancer B. for patients undergoing ADT therapy with docetaxel due to newly diagnosed, hormone-sensitive, metastatic prostate cancer C. with castration-resistant metastatic prostate cancer, continuing ADT therapy in combination with enzalutamide or abiraterone acetate in relation to changes in the BMI index

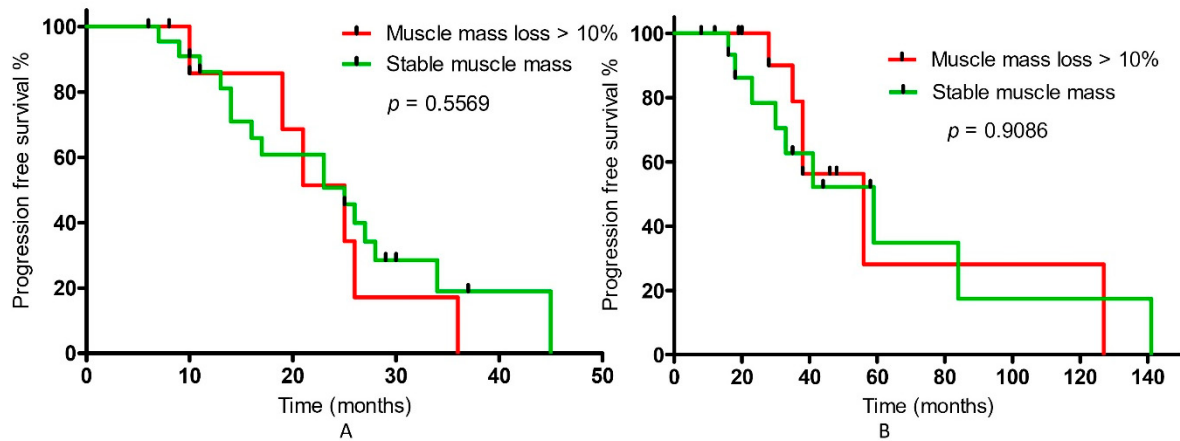

**Figure S3** Progression-free survival distribution for patients A. undergoing ADT therapy with docetaxel due to newly diagnosed, hormone-sensitive, metastatic prostate cancer B. with castration-resistant metastatic prostate cancer, continuing ADT therapy in combination with enzalutamide or abiraterone acetate in relation to muscle mass changes.

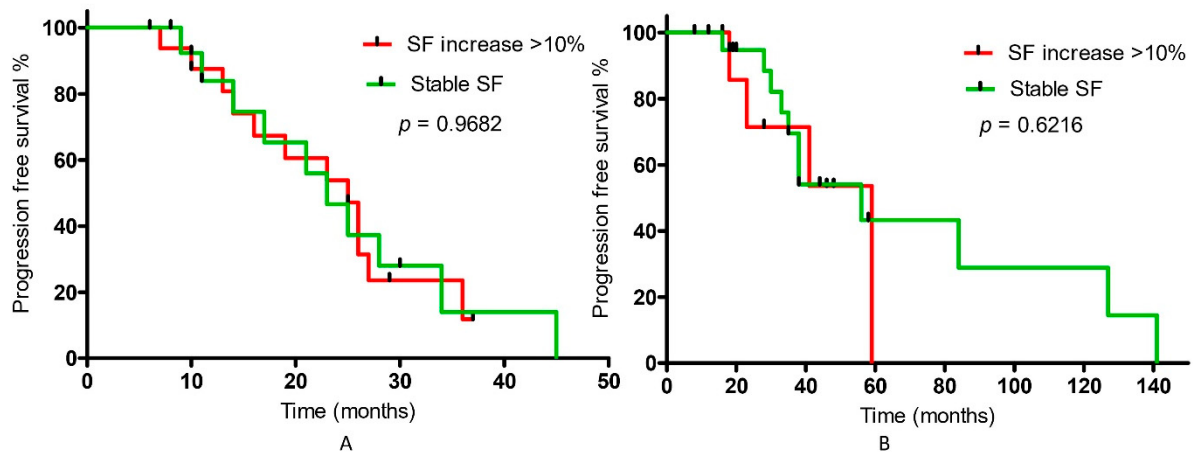

**Figure S4** Progression-free survival distribution for patients A. undergoing ADT therapy with docetaxel due to newly diagnosed, hormone-sensitive, metastatic prostate cancer B. with castration-resistant metastatic prostate cancer, continuing ADT therapy in combination with enzalutamide or abiraterone acetate in relation to SF changes

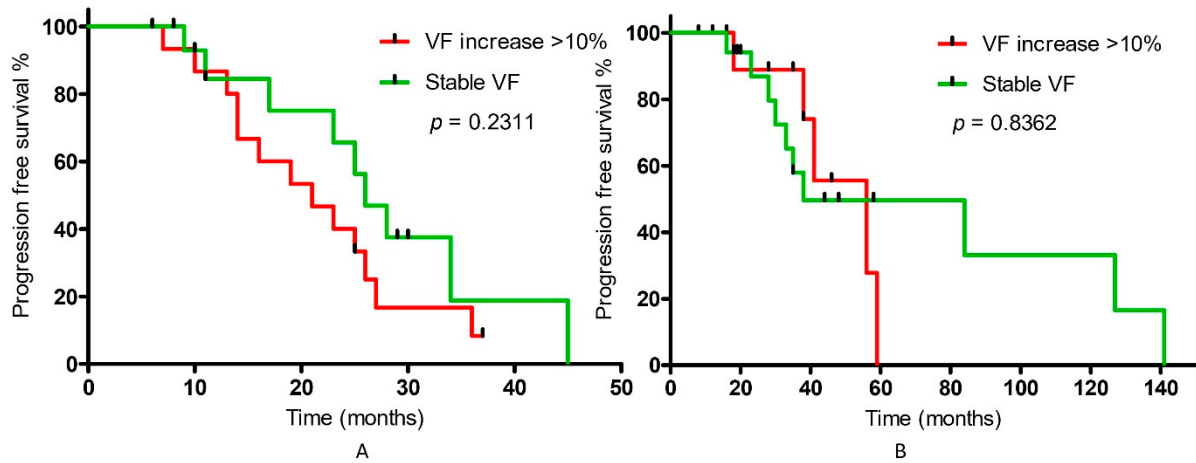

**Figure S5** Progression-free survival distribution for patients A. undergoing ADT therapy with docetaxel due to newly diagnosed, hormone-sensitive, metastatic prostate cancer B. with castration-resistant metastatic prostate cancer, continuing ADT therapy in combination with enzalutamide or abiraterone acetate in relation to VF changes.

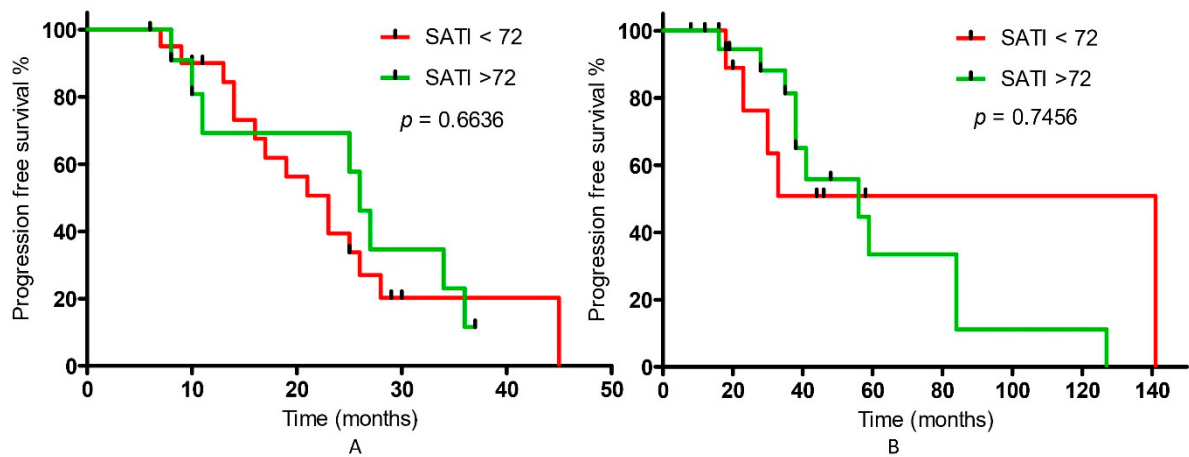

**Figure S6** Progression-free survival distribution for patients A. undergoing ADT therapy with docetaxel due to newly diagnosed, hormone-sensitive, metastatic prostate cancer B. with castration-resistant metastatic prostate cancer, continuing ADT therapy in combination with enzalutamide or abiraterone acetate in relation to SATI changes.

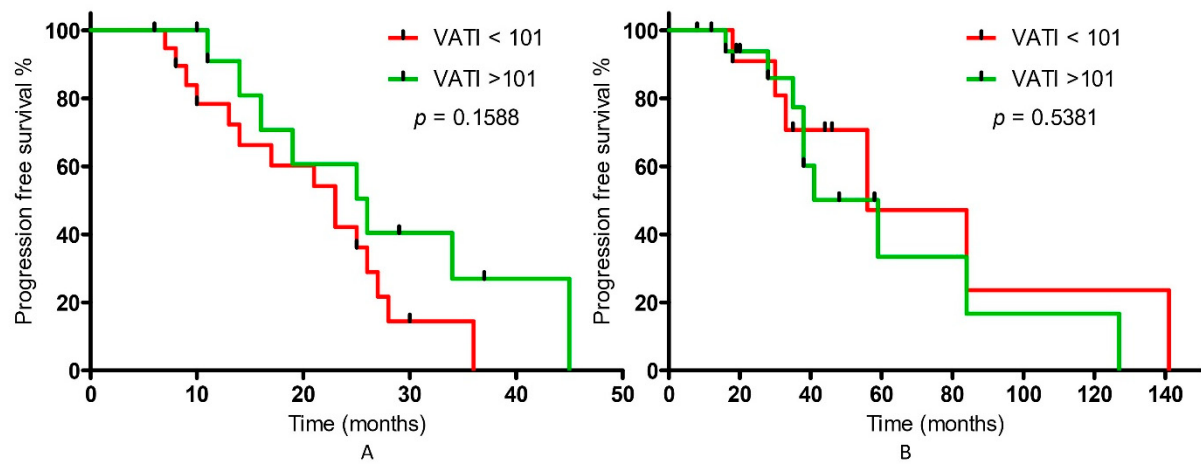

**Figure S7** Progression-free survival distribution for patients A. undergoing ADT therapy with docetaxel due to newly diagnosed, hormone-sensitive, metastatic prostate cancer B. with castration-resistant metastatic prostate cancer, continuing ADT therapy in combination with enzalutamide or abiraterone acetate in relation to VATI changes.
